# Supplementary material for: Removal of Antibiotic Resistance Genes, Class 1 Integrase Gene and Escherichia coli Indicator Gene in a Microalgae-Based Wastewater Treatment System
Source: MDPI journal article supplement (doi:10.3390/antibiotics11111531), 2022-11-02
Supplement: s1 [file s1]

# Removal of Antibiotic Resistance Genes, Class 1 Integrase Gene and *Escherichia coli* Indicator Gene in a Microalgae-Based Wastewater Treatment System

**Table S1** Primer pairs and annealing temperatures used in the current study.

| Primer                | Primer sequence (5'-3') | Annealing Temp./Number of cycles | Reference               |
|-----------------------|-------------------------|----------------------------------|-------------------------|
| 338-F                 | ACTCCTACGGGAGGCAGCAG    | 58°C/35                          | Yan et al. (2018)       |
| 518-R                 | ATTACCGCGGCTGCTGG       |                                  |                         |
| intI1-F               | GGCTTCGTGATGCCTGCTT     | 55°C/35                          | Chen et al. (2016)      |
| intI1-R               | CATTCCTGGCCGTGGTTCT     |                                  |                         |
| tetO-F                | ACGGARAGTTTATTGTATACC   | 55°C/35                          | Al-Jassim et al. (2015) |
| tetO-R                | TGGCGTATCTATAATGTTGAC   |                                  |                         |
| tetW-F                | GAGAGCCTGCTATATGCCAGC   | 60°C/40                          | Al-Jassim et al. (2015) |
| tetW-R                | GGGCGTATCCACAATGTTAAC   |                                  |                         |
| tetX-F                | AGCCTTACCAATGGGTGTAAG   | 60°C/40                          | Dong et al. (2019)      |
| tetX-R                | TTCTTACCTTGGACATCCCG    |                                  |                         |
| bla <sub>TEM</sub> -F | AGCATCTTACGGATGGCATGA   | 60°C /40                         | Gao et al. (2020)       |
| bla <sub>TEM</sub> -R | TCCTCCGATCGTTGTCAGAAGT  |                                  |                         |
| bla <sub>CTX</sub> -F | AGTGAAAGCGAACCGAATC     | 55°C/40                          | Wen et al. (2016)       |
| bla <sub>CTX</sub> -R | CTGTCACCAATGCTTTACC     |                                  |                         |
| ermB-F                | AAAACCTTACCCGCCATACCA   | 55°C/40                          | Knapp et al. (2010)     |
| ermB-R                | TTTGGCGTGTTTCATTGCTT    |                                  |                         |
| aadA-F                | GTTGTGCACGACGACATCAT    | 55°C/35                          | Su et al. (2020)        |
| aadA-R                | TGGTGGTACTTCATCGGCATA   |                                  |                         |
| sul1-F                | CACCGGAAACATCGCTGCA     | 55°C/35                          | Cheng et al. (2020)     |
| sul1-R                | AAGTTCCGCCGCAAGGCT      |                                  |                         |
| sul2-F                | GCGCTCAAGGCAGATGGCATT   | 55°C/40                          | Cheng et al. (2020)     |
| sul2-R                | GCGTTTGATACCGGCACCCGT   |                                  |                         |
| cmlA-F                | GCCAGCAGTGCCGTTTAT      | 55°C/40                          | Chen et al. (2016)      |
| cmlA-R                | GGCCACCTCCCAGTAGAA      |                                  |                         |
| floR-F                | CGGTCGGTATTGTCTTCACG    | 58°C/40                          | Chen et al. (2016)      |
| floR-R                | TCACGGGCCACGCTGTAT      |                                  |                         |
| uidA-F                | AAAACGGCAAGAAAAAGCAG    | 60°C/40                          | Adekanmbi et al. (2020) |
| uidA-R                | ACGCGTGTTACAGTCTTGCG    |                                  |                         |

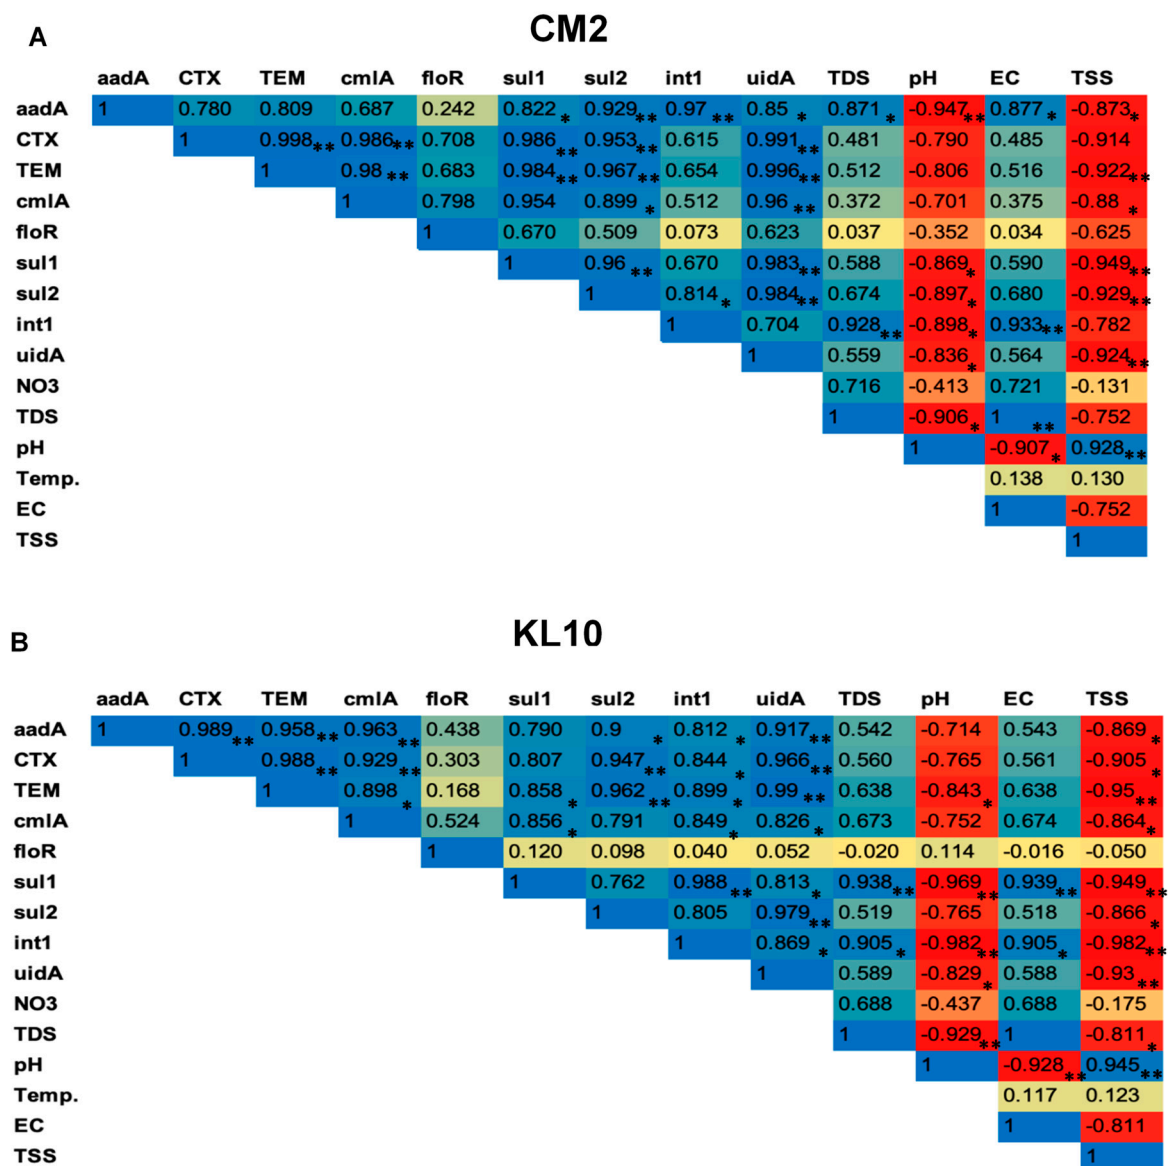

**Figure S1.** Correlation of the study genes with physicochemical water quality parameters in the monocultures. \*\* Correlation is significant at the 0.01 level (2-tailed); \*. Correlation is significant at the 0.05 level (2-tailed).

A

CK

|      | aadA | CTX     | TEM     | cmIA    | floR  | sul1  | sul2    | int1   | uidA    | TDS     | pH       | EC       | TSS      |
|------|------|---------|---------|---------|-------|-------|---------|--------|---------|---------|----------|----------|----------|
| aadA | 1.00 | 0.98 ** | 0.98 ** | 0.97 ** | -0.18 | 0.71  | 0.93 ** | 0.34   | 0.97 ** | 0.72    | -0.92 ** | 0.73     | -0.96 ** |
| CTX  |      | 1.00    | 1.00    | 1.00    | -0.13 | 0.54  | 0.91 *  | 0.14   | 1.00    | 0.57    | -0.83 *  | 0.59     | -0.92 ** |
| TEM  |      |         | 1.00    | 1.00    | -0.07 | 0.55  | 0.94 ** | 0.13   | 1.00    | 0.56    | -0.82 *  | 0.58     | -0.91 *  |
| cmIA |      |         |         | 1.00    | -0.12 | 0.51  | 0.91 *  | 0.10   | 1.00    | 0.55    | -0.81 *  | 0.57     | -0.92 ** |
| floR |      |         |         |         | 1.00  | -0.28 | 0.14    | -0.39  | -0.07   | -0.55   | 0.44     | -0.56    | 0.45     |
| sul1 |      |         |         |         |       | 1.00  | 0.67    | 0.90   | 0.52    | 0.92 ** | -0.85    | 0.91     | -0.69    |
| sul2 |      |         |         |         |       |       | 1.00    | 0.27 * | 0.93    | 0.55    | -0.77    | 0.57     | -0.80    |
| int1 |      |         |         |         |       |       |         | 1.00   | 0.10 ** | 0.84    | -0.61    | 0.82     | -0.38    |
| uidA |      |         |         |         |       |       |         |        | 1.00    | 0.53    | -0.80    | 0.55     | -0.90    |
| NO3  |      |         |         |         |       |       |         |        |         | 0.73    | -0.44    | 0.70     | -0.19    |
| TDS  |      |         |         |         |       |       |         |        |         | 1.00    | -0.93 ** | 1.00     | -0.80    |
| pH   |      |         |         |         |       |       |         |        |         |         | 1.00     | -0.94 ** | 0.95     |
| EC   |      |         |         |         |       |       |         |        |         |         |          | 1.00     | -0.82 *  |
| TSS  |      |         |         |         |       |       |         |        |         |         |          |          | 1.00     |

B

WW

|       | aadA | CTX     | TEM     | cmIA    | floR | sul1  | sul2    | int1    | uidA    | TDS     | pH       | EC      | TSS      |
|-------|------|---------|---------|---------|------|-------|---------|---------|---------|---------|----------|---------|----------|
| aadA  | 1.00 | 0.99 ** | 0.99 ** | 0.96 ** | 0.17 | 0.42  | 0.42    | 0.67    | 0.99 ** | 0.60    | -0.84 *  | 0.60    | -0.93 ** |
| CTX   |      | 1.00    | 0.97 ** | 0.92 ** | 0.11 | 0.51  | 0.50    | 0.75    | 0.98 ** | 0.69    | -0.88 *  | 0.69    | -0.95 ** |
| TEM   |      |         | 1.00    | 0.98 ** | 0.12 | 0.37  | 0.37    | 0.62    | 1.00    | 0.55    | -0.81    | 0.55    | -0.89 *  |
| cmIA  |      |         |         | 1.00    | 0.22 | 0.29  | 0.29    | 0.56    | 0.98 ** | 0.47    | -0.74    | 0.47    | -0.87 *  |
| floR  |      |         |         |         | 1.00 | -0.26 | -0.22   | -0.11   | 0.13    | -0.18   | 0.20     | -0.17   | -0.23    |
| sul1  |      |         |         |         |      | 1.00  | 0.97 ** | 0.95 ** | 0.36    | 0.98 ** | -0.83 *  | 0.98 ** | -0.64    |
| sul2  |      |         |         |         |      |       | 1.00    | 0.91 *  | 0.36    | 0.95    | -0.82    | 0.95    | -0.59    |
| int1  |      |         |         |         |      |       |         | 1.00    | 0.62    | 0.99 ** | -0.93 ** | 0.99 ** | -0.84 *  |
| uidA  |      |         |         |         |      |       |         |         | 1.00    | 0.54    | -0.81    | 0.54    | -0.89 *  |
| NO3   |      |         |         |         |      |       |         |         |         | 0.73    | -0.45    | 0.73    | -0.17    |
| TDS   |      |         |         |         |      |       |         |         |         | 1.00    | -0.91 *  | 1.00    | -0.78    |
| pH    |      |         |         |         |      |       |         |         |         |         | 1.00     | -0.91 * | 0.87 *   |
| Tempe |      |         |         |         |      |       |         |         |         |         |          | 0.13    | 0.06     |
| EC    |      |         |         |         |      |       |         |         |         |         |          | 1.00    | -0.78    |
| TSS   |      |         |         |         |      |       |         |         |         |         |          |         | 1.00     |

**Figure S2.** Correlation of the study genes with physicochemical water quality parameters in the multi-species cultures.

\*\*Correlation is significant at the 0.01 level (2-tailed); \*Correlation is significant at the 0.05 level (2-tailed)
